# Supplementary material for: Brevundimonas vesicularis (S1T13) Mitigates Drought-Stress-Associated Damage in Arabidopsis thaliana
Source: MDPI journal article supplement (doi:10.3390/ijms242316590), 2023-11-22
Supplement: s1 [file s1]

**Supplementary Table S1.** List of the primers used in the current study

| No | Gene             | Forward sequence (5'→3') | Reverse sequence (5'→3') |
|----|------------------|--------------------------|--------------------------|
| 1  | <i>AtDREB1A</i>  | ACGAGTCTTCGGTTCCTCA      | ACAAACCCACTTACCGGAGT     |
| 2  | <i>AtDREB2A</i>  | GACCTAAATGGCGACGATGT     | TCGAGCTGAAACGGAGGTAT     |
| 3  | <i>AtAO3</i>     | TGGTAGAGGAGGTCTCGGAA     | GGTTCACCCACTGGATGGTA     |
| 4  | <i>AtABA3</i>    | CGTCGTCAGTGGAAGGTTTC     | AATTCACCGGTCAGACCCT      |
| 5  | <i>AtCAT1</i>    | TCGGGTGCTCCTGTCTGGAA     | CTGGCTCCCCTGGCATGAAC     |
| 6  | <i>AtSOD1</i>    | GCAGTGAGGGTGTTACGGGG     | CTCAGGGGACCGTGTGTTT      |
| 7  | <i>AtGSH</i>     | TCCGCTTTTCTCGGCCCATC     | TTCTCTGCTGCAGCCCTTGC     |
| 8  | <i>AtPOD</i>     | TTCGCGTACGATTCACCGGG     | GGAGCTACGCTGGGTGTGAC     |
| 9  | <i>AtActin 2</i> | AGGTTCTGTTCCAGCCATC      | TTAGAAGCATTTCCTGTGAAC    |
